# Supplementary material
Source: PubMed Central journal article supplement (PMC2906847)
Supplement: 1004552107_pnas.201004552SI.pdf [file 1004552107_pnas.201004552SI.pdf]

# Supporting Information

Palacios-Prado et al. 10.1073/pnas.1004552107

## SI Text

**Cells and Culture Conditions.** Experiments with homotypic junctions were performed on HeLa cells (ATCC CCL2) transfected with wild-type connexin45 (Cx45), its fusion form with green fluorescent protein tagged to the C terminus (Cx45-EGFP), or connexin43 (Cx43)-EGFP. Experiments with heterotypic junctions were performed on cocultures of HeLa cells expressing wild-type Cx45 or Cx43-EGFP. Cells were grown in Dulbecco's modified Eagle medium supplemented with 10% FCS. The cells were passaged weekly by 1:10 dilution and maintained in a 95% O<sub>2</sub>–5% CO<sub>2</sub> moist atmosphere at 37 °C. All media and culture reagents (GIBCO-BRL) were obtained from Life Technologies. The transfection procedure has been described previously (1).

**Electrophysiological and Fluorescence Measurements.** For simultaneous electrophysiological and fluorescence recording, cells grown on glass coverslips were transferred to an experimental chamber with constant flow-through perfusion mounted on the stage of an Olympus IX70 inverted microscope (Olympus America) equipped with a Hamamatsu cooled digital camera and UltraView fluorescence imaging system (Perkin-Elmer Life Sciences). Appropriate excitation and emission filters (Chroma Technology) were used to image EGFP and 2,7-bis(2-carboxyethyl)-5(6)-carboxyfluorescein (BCECF). Junctional conductance,  $g_j$ , was measured in selected cell pairs by dual whole-cell patch clamp. Each cell of a pair was voltage clamped independently with a separate patch clamp amplifier EPC8 (HEKA Elektronik). Voltages and currents were digitized using a MIO-163 A/D converter (National Instruments) and acquired and analyzed using custom-made software (2). The voltage in cell 1 ( $\Delta V_1$ ) was stepped while the voltage in cell 2 was kept constant, and junctional current ( $I_j$ ) was measured as the negative of the change in current in cell 2,  $I_j = -\Delta I_2$ . Junctional conductance ( $g_j$ ) was given as  $-I_j/\Delta V_1$ . To reduce effects of series resistance on measurements of  $g_j$  (3), we selected cell pairs exhibiting small junctional plaques (JP) ( $< 4 \mu\text{m}$  in diameter) and

used patch pipettes with resistances below 5 M $\Omega$ . Typically, cell pairs without JPs showed no electrical coupling. Experiments were performed at room temperature in modified Krebs-Ringer (MKR) solution, composition (in mM): NaCl, 140; KCl, 4; CaCl<sub>2</sub>, 2; MgCl<sub>2</sub>, 1; glucose, 5; pyruvate, 2; Hepes, 5 (pH 7.4). Patch pipettes were filled with saline containing (in mM): KCl, 130; sodium aspartate, 10; MgCl<sub>2</sub>, 1; CaCl<sub>2</sub>, 0.2; EGTA, 2; Hepes, 5 (pH = 7.2). Ammonium chloride (NH<sub>4</sub>Cl) or CO<sub>2</sub> was used to increase or reduce the intracellular pH (pH<sub>i</sub>).

**Fluorescence Imaging Studies.** Fluorescence signals were acquired using UltraVIEW software for image acquisition and analysis (Perkin-Elmer Life Sciences). For pH<sub>i</sub> measurement, cells were loaded introducing the unesterified form of BCECF (8  $\mu\text{M}$ ) into the cells through patch pipettes in whole-cell voltage clamp mode. Dye was excited alternately with low-intensity 436-nm and 500-nm light for 0.5 s every 15 s (to minimize photobleaching), and the emitted light was filtered at 540 nm. The emitted light from 500-nm excitation is pH sensitive, whereas that from 436-nm excitation is much less pH sensitive, so that the ratio of emitted light at the two excitation wavelengths is a function of pH<sub>i</sub>. All experiments were performed at room temperature. We found no difference in fluorescence intensity over time when images were acquired once every 20 s or every 5 s, indicating that dye bleaching was minimal. In our studies we typically observed less than ~5% decay of emitted light intensity over 1 h of measurement. In addition, during whole-cell recording conditions, unbleached BCECF molecules can diffuse from the pipette into the cell, perhaps accounting for the low level of bleaching. Moreover, it is well established that ratiometric measurements are relatively insensitive to bleaching effects.

**Statistical Analysis.** The analysis was performed using SigmaPlot software, and averaged data are reported as the means  $\pm$  SEM.

1. Kreuzberg MM, et al. (2005) Functional properties of mouse connexin30.2 expressed in the conduction system of the heart. *Circ Res* 96:1169–1177.
2. Trexler EB, Bukauskas FF, Bennett MVL, Bargiello TA, Verselis VK (1999) Rapid and direct effects of pH on connexins revealed by the connexin46 hemichannel preparation. *J Gen Physiol* 113:721–742.

3. Wilders R, Jongsma HJ (1992) Limitations of the dual voltage clamp method in assaying conductance and kinetics of gap junction channels. *Biophys J* 63:942–953.

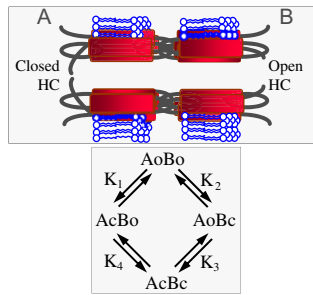

**Fig. S1.** Schematics of the GJ channel containing A and B hemichannels, each with its own fast gate at the cytoplasmic end of the channel. At the bottom is shown the scheme of transitions in the four-state model. AoBo: both gates are open; AcBo: gate A is closed, and gate B is open; AoBc: gate A is open, and gate B is closed; and AcBc: both gates are closed. Transitions between adjacent states are described by equilibrium constants,  $K_i = e^{A_i \cdot (\Pi \cdot V_{j,H} - V_{o,H,i})}$  ( $i = 1-4$ ), where  $A_i$  is the voltage sensitivity coefficient,  $V_{j,H}$  is the voltage across hemichannel,  $V_{o,H,i}$  is the voltage at which occupation of the two states is equal, and  $\Pi$  is a gating polarity. The two gates are in series and operate in a contingent manner in which voltage across one gate depends on the state of series gate. The state of each gate (open/residual) was determined stochastically by the fraction of transjunctional voltage ( $V_j$ ) that falls across each hemichannel. The model allows for the input of unitary conductances of open and residual states, which rectifies  $\gamma = \gamma_o \cdot e^{V_j/HR}$ , where  $\gamma_o$  is conductance at  $V_{j,H} = 0$ , and  $R$  is a rectification coefficient. The simulation typically requires  $\sim 10$  s to calculate  $g_j$ - $V_j$  plots for a junction containing 1,000 channels. (This figure was modified from figure 5 in ref. 1).

1. Paulauskas N, Pranevicius M, Pranevicius H, Bukauskas FF (2009) A stochastic four-state model of contingent gating of gap junction channels containing two "fast" gates sensitive to transjunctional voltage. *Biophys J* 96:3936-3948.

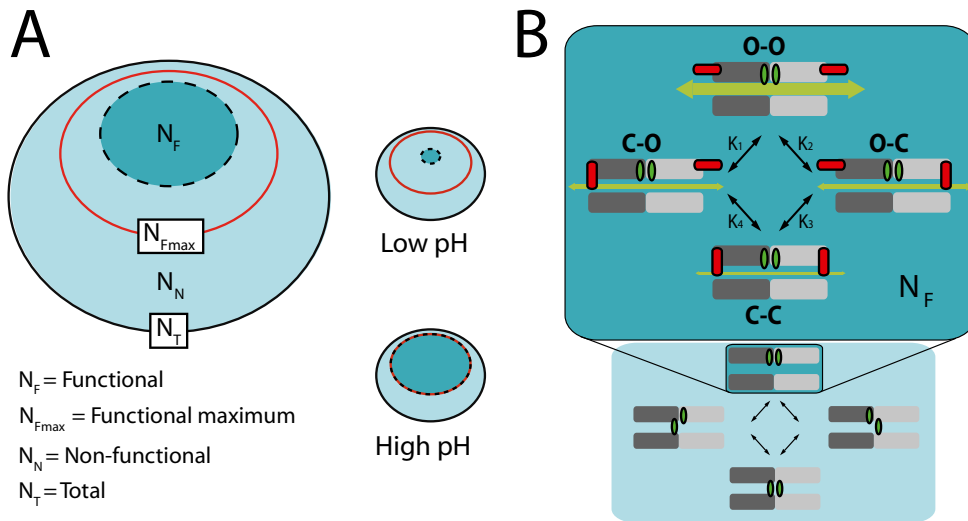

**Fig. S2.** (A) Venn diagram in which the total number ( $N_T$ ) of gap junction (GJ) channels is composed of the maximum number of functional channels ( $N_{Fmax}$ ) and nonfunctional ( $N_N$ ) channels. Functional channels ( $N_F$ ) operate in response to  $V_j$  and their number changes depending on  $pH_i$ .  $N_N$  channels are permanently closed.  $N_{Fmax}$  was estimated from the maximum  $N_F$  measured at intracellular pH ( $pH_i$ )  $> 8$ , at  $V_j = 0$ . Small Venn diagrams illustrate changes of  $N_F$  depending on  $pH_i$ . (B) Schematic of  $N_F$  GJ channels with slow (green) and fast (red) gates in open or closed states for the right (light gray) and left (dark gray) hemichannels of the GJ channel. In  $N_F$  channels both slow gates are open, and the fast gates may be open or closed.  $N_F$  channels can dwell in four different states [open-open (O-O), both aHCs open; open-closed (O-C) and closed-open (C-O), one aHC open and one closed; and closed-closed (C-C), both aHCs closed] depending on the state of the fast gates, resulting in three possible conductances:  $\gamma_o$  for O-O, residual conductance ( $\gamma_{res}$ ) for O-C and C-O, and  $\gamma_{res2}$  (for C-C).  $K_i$  ( $i = 1-4$ ) are equilibrium constants of transitions between adjacent states. If one of the slow gates is closed, then the channel is fully closed. At alkaline  $pH_i$ , all  $N_F$  channels are open, and  $N_F = N_{Fmax}$ .

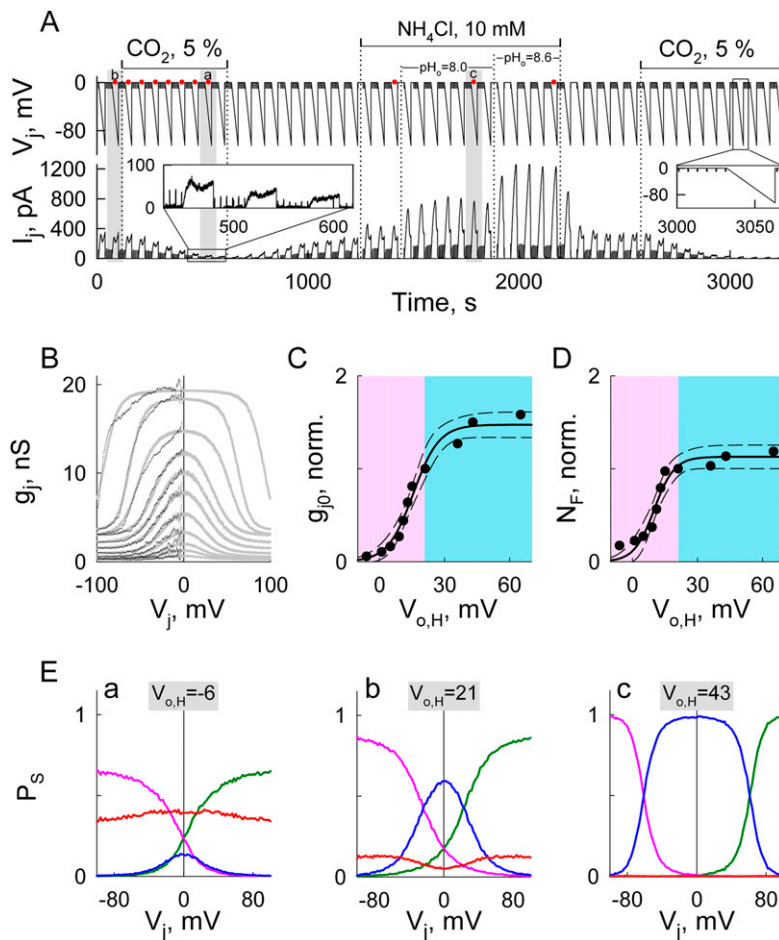

**Fig. 53.** pH-dependent modulation of  $V_j$  gating in Cx45 homotypic GJs. (A)  $I_j$  record in a HeLaCx45 cell pair in response to repeated  $V_j$  ramps (31 s duration) from 0 to -100 mV during an exposure to MKR solution saturated with 5%  $\text{CO}_2$  or containing  $\text{NH}_4\text{Cl}$ . Initial pH of the MKR solution was 7.4 except where otherwise indicated. Voltage steps of -10 mV were used to follow  $g_j$  between  $V_j$  ramps (Right Inset). Responses at low pH are shown at higher gain (Left Inset). Responses to the second acidification on the right were very similar. (B) Junctional conductance-transjunctional voltage ( $g_j$ - $V_j$ ) plots (in black) calculated for the  $V_j$  ramps marked with red dots in A. Fits to the experimental data (gray lines) were calculated assuming symmetry of the  $g_j$ - $V_j$  relation. (C) Relation between  $g_j$ s normalized to  $g_j$  at  $V_j = 0$  mV under control conditions ( $g_{j0}$ , norm.) and the voltage across an apposed hemichannel at which its open probability,  $P_{o,H}$ , is 0.5 ( $V_{o,H}$ ). Acidic conditions are shown in light pink, and alkaline conditions are shown in light blue relative to pH = 7.2. (D) Relation between  $N_F$  normalized to  $N_F$  at pH = 7.2 and  $V_{o,H}$ . Relations shown in C and D were obtained from fits in B. Solid lines in C and D are fits to the data using a sigmoidal equation ( $y = a/(1+e^{-((x-x_0)/b)})$ ). Dashed lines show 95% confidence intervals (CI). (E) Probability that channels dwell in  $P_{o-o}$  (blue),  $P_{c-o}$  (green),  $P_{o-c}$  (pink), and  $P_{c-c}$  (red) states obtained from fitting of records during the ramps a-c marked with gray rectangles in A. Calculated values of  $V_{o,H}$  are indicated.

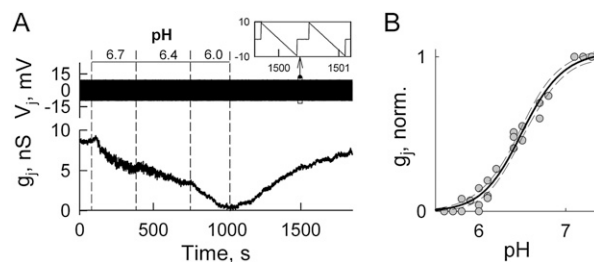

**Fig. 54.** Effect of pH on  $g_j$  of Cx43-EGFP homotypic GJs. (A) pH and  $g_j$  measurements in a HeLaCx43-EGFP cell pair during application of 0.5, 2, and 5%  $\text{CO}_2$  resulting in pH of 6.7, 6.4, and 6.0, respectively. Junctional conductance ( $g_j$ ) was measured by applying repeated  $V_j$  ramps (600 ms in duration) from +10 mV to -10 mV (Inset). (B) Gray circles show normalized  $g_j$ -pH dependence of homotypic Cx43-EGFP GJs ( $n = 7$ ). The solid black curve shows fit to the data (gray circles) of a Hill equation; acid dissociation constant ( $\text{pK}_a$ ) equal  $6.50 \pm 0.03$ ; Hill coefficient  $n = 1.98$ . Dashed lines show 95% confidence bands.

**Table S1. Parameters of voltage gating obtained from data shown in Figs. 2B and 3B**

| Ramp no.  | $A_H$ | $V_{o,H}$ | $\gamma_{o,H}$ | $N_F$ |
|-----------|-------|-----------|----------------|-------|
| Figure 2B |       |           |                |       |
| 1         | 0.09  | 23        | 64             | 701   |
| 2         | 0.10  | 21        | 64             | 624   |
| 3         | 0.11  | 19        | 64             | 548   |
| 4         | 0.11  | 17        | 64             | 437   |
| 5         | 0.11  | 12        | 64             | 363   |
| 6         | 0.11  | 11        | 64             | 294   |
| 7         | 0.11  | 7         | 64             | 241   |
| 8         | 0.11  | 3         | 64             | 202   |
| 9         | 0.11  | 0         | 64             | 169   |
| 10        | 0.11  | -4        | 64             | 134   |
| Figure 3B |       |           |                |       |
| 1         | 0.11  | 25        | 64             | 948   |
| 2         | 0.11  | 34        | 64             | 1,127 |
| 3         | 0.11  | 50        | 64             | 1,324 |

aHC, apposed hemichannel;  $A_H$ , coefficient characterizing the steepness of  $P_{o,H}$  changes as a function of  $V_H$ ;  $\gamma_{o,H}$ , single aHC conductance;  $N_F$ , number of functional channels;  $P_{o,H}$ , open probability of aHC;  $V_{o,H}$ , voltage across aHC at which its  $P_{o,H} = 0.5$ .

**Table S2. Parameters of voltage gating obtained from data shown in Figs. 4F and 5B**

| aHC        | Ramp # | $A_H$ | $V_{o,H}$ | $\gamma_{o,H}$ | $N_F$ |
|------------|--------|-------|-----------|----------------|-------|
| Cx45       | 1      | 0.11  | 4         | 64             | 113   |
|            | 2      | 0.11  | 10        | 64             | 221   |
|            | 7      | 0.10  | 21        | 64             | 697   |
|            | 3      | 0.11  | 31        | 64             | 849   |
|            | 4      | 0.11  | 39        | 64             | 945   |
|            | 6      | 0.09  | 58        | 64             | 1056  |
| Cx43-EGFP  | 1      | 0.09  | 30        | 220            | 113   |
|            | 2      | 0.10  | 40        | 220            | 221   |
|            | 7      | 0.10  | 40        | 220            | 697   |
|            | 3      | 0.10  | 50        | 220            | 849   |
|            | 4      | 0.10  | 50        | 220            | 945   |
|            | 6      | 0.09  | 50        | 220            | 1056  |
| Cx45       | 1      | 0.10  | 15        | 64             | 1076  |
|            | 2      | 0.10  | 9         | 64             | 896   |
|            | 3      | 0.10  | 5         | 64             | 781   |
|            | 4      | 0.10  | 3         | 64             | 605   |
|            | 5      | 0.10  | -2        | 64             | 483   |
|            | 6      | 0.10  | -5        | 64             | 350   |
|            | 7      | 0.10  | -8        | 64             | 213   |
|            | 8      | 0.10  | -11       | 64             | 108   |
| Cx43- EGFP | 1      | 0.09  | 75        | 220            | 1076  |
|            | 2      | 0.09  | 75        | 220            | 896   |
|            | 3      | 0.09  | 75        | 220            | 781   |
|            | 4      | 0.10  | 70        | 220            | 605   |
|            | 5      | 0.10  | 55        | 220            | 483   |
|            | 6      | 0.10  | 46        | 220            | 350   |
|            | 7      | 0.10  | 38        | 220            | 213   |
|            | 8      | 0.10  | 35        | 220            | 108   |

aHC, apposed hemichannel;  $A_H$ , coefficient characterizing the steepness of  $P_{o,H}$  changes as a function of  $V_H$ ;  $\gamma_{o,H}$ , single aHC conductance;  $N_F$ , number of functional channels;  $P_{o,H}$ , open probability of aHC;  $V_{o,H}$ , voltage across aHC at which its  $P_{o,H} = 0.5$ .
